# Supplementary material for: Reagentless Glucose Biosensor Based on Combination of Platinum Nanostructures and Polypyrrole Layer
Source: MDPI journal article supplement (doi:10.3390/bios14030134), 2024-03-04
Supplement: s1 [file biosensors-2864441-supplementary.pdf › biosensors-2864441-supplementary.pdf]

# Reagentless Glucose Biosensor Based on Combination of Platinum Nanostructures and Polypyrrole Layer

Natalija German <sup>1,\*</sup>, Anton Popov <sup>1,2</sup> and Almira Ramanaviciene <sup>1,2,\*</sup>

<sup>1</sup> Department of Immunology and Bioelectrochemistry, State Research Institute Centre for Innovative Medicine, Santariskiu 5, LT-08406, Vilnius, Lithuania

<sup>2</sup> NanoTechnas—Center of Nanotechnology and Materials Science, Institute of Chemistry, Faculty of Chemistry and Geosciences, Vilnius University, Naugarduko str. 243, LT-03225 Vilnius, Lithuania

\* Correspondence: natalija.german@imcentras.lt (N.G.); almira.ramanaviciene@chf.vu.lt (A.R.)

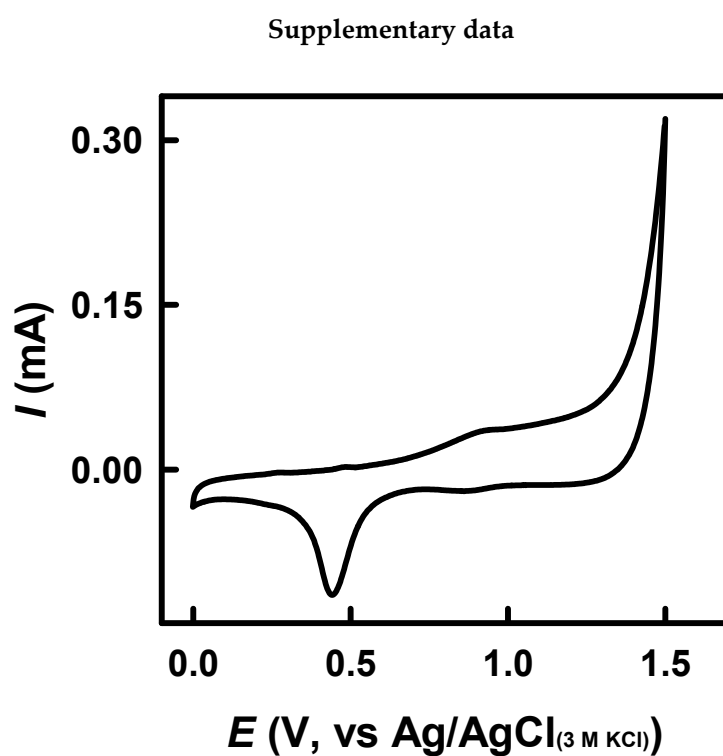

**Figure S1.** Cyclic voltammogram registered using GR/PtNS electrode in 0.5 M  $\text{H}_2\text{SO}_4$  solution.

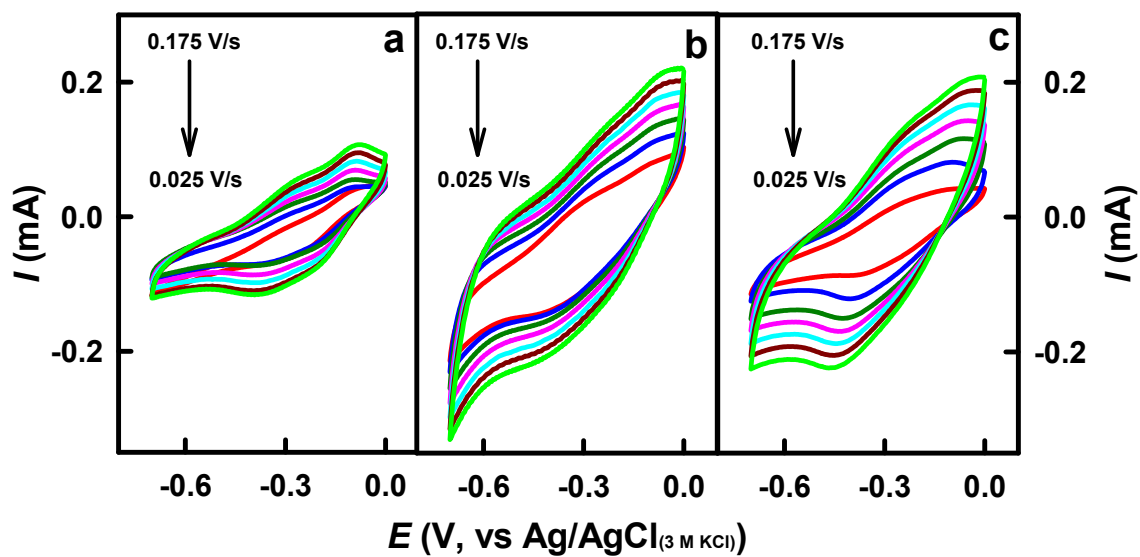

**Figure S2.** Cyclic voltammograms of GR/PD/GOx (a), GR/PtNS/PD/GOx (b), and GR/PtNS/PD/GOx/Ppy (c) electrodes recorded at scan rates from 0.025 to 0.175 V/s in the solution of 1 mM  $\text{Ru}(\text{NH}_3)_6\text{Cl}_3$  with 0.1 M KCl.

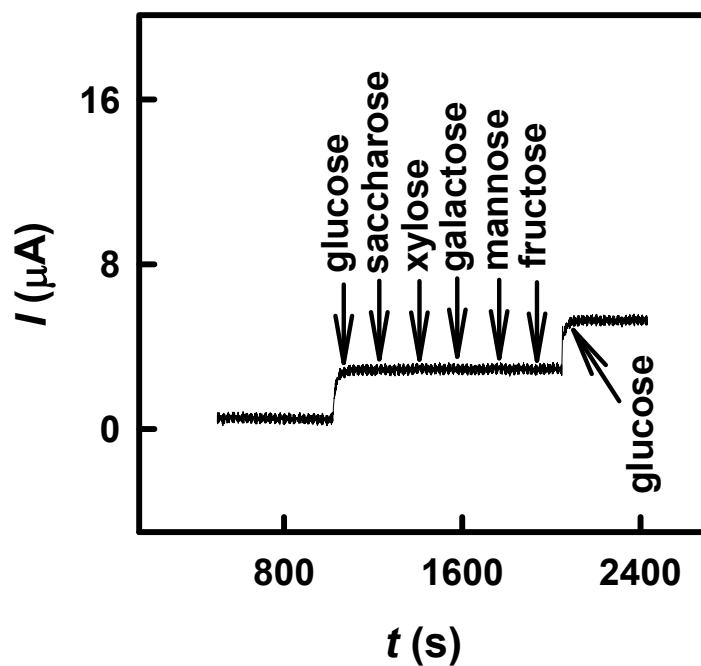

**Figure S3.** The impact of sugars on the current response of glucose biosensors based on the GR/PtNS/PD/GOx/Ppy electrode. An amperogram was registered in a 10-times diluted sample of blood serum after the addition of 10.0 mM glucose and 1.0 mM of various sugars at +0.30 V vs.  $\text{Ag}/\text{AgCl}_{(3\text{M KCl})}$ .

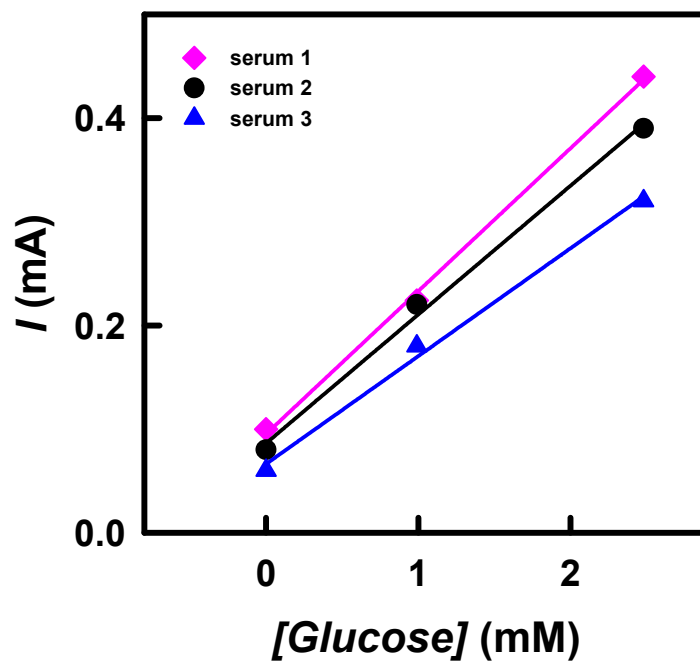

**Figure S4.** The determination of glucose in blood serum. Measurements were performed at +0.30 V vs. Ag/AgCl<sub>(3M KCl)</sub> in a 10-times diluted sample of blood serum with 0.708 mM of glucose using the addition method.
